# Supplementary material for: The structural basis of actinomycin D–binding induces nucleotide flipping out, a sharp bend and a left-handed twist in CGG triplet repeats
Source: PubMed Central journal article supplement — Nucleic Acids Res. 2013 Feb 12;41(7):4284–94. doi: 10.1093/nar/gkt084 (PMC3627577; doi:10.1093/nar/gkt084), 2013-02-12

**The structural basis of actinomycin D binding induces nucleotide  
flipping-out, a sharp bend and a left-handed twist in CGG triplet  
repeats**

Yu-Sheng Lo<sup>1†</sup>, Wen-Hsuan Tseng<sup>1†</sup>, Chien-Ying Chuang<sup>1</sup>, and  
Ming-Hon Hou<sup>1,2,3</sup>

**Supporting Information**

## Figure legends for supporting information

**Figure S1.** A refined ( $2F_o - F_c$ ) Fourier electron density map showing the five amino acids (threonine, N-methylvaline, sarcosine, proline, and D-valine).

**Figure S2.** Schematic diagram of the ActD-(ATGCGGCAT)<sub>2</sub> as observed in the crystal structure.

**Figure S3.** Molecular interactions due to crystal packing. The flipped-out G6 (**A**) and G15 (**B**) bases of the DNA duplex form hydrogen bonds and mutual stacking interaction with the flipped out G6 and G15 bases of other duplexes with an equivalent symmetry.

**Figure S4.** The detailed conformation showing the stacking interactions in the ActD1-DNA (left) and ActD2-DNA (right) complexes at various base pair steps of the refined structure viewed from the minor groove direction. Hydrogen bonds are indicated as blue dotted lines.

**Figure S5.** Superimposition of the crystal structures of ActD1 (blue), ActD2 (green), and free ActD (red).

**Figure S6.** Comparison of the DNA twist (**A**), roll (**B**) and tilt (**C**) parameters in the structure of the ActD-(ATGCGGCAT)<sub>2</sub> complex. Typical values for A-DNA (solid line) and B-DNA (dashed line) are also shown.

**Figure S7.** (A) The crystal packing (P6<sub>5</sub>22) diagram of the ActD-DNA complex. (B) Two major different packing interactions occur between the two asymmetric units in the crystal lattice (P6<sub>5</sub>22): end-to-end and end-to-side, mediated by  $\pi$ - $\pi$  stacking, and van der Waals contact.

**Figure S8.** Sensorgram of the ActD-DNA interaction between immobilised hairpin DNA duplexes including GG2 (A), AT2 (B), and GC2 (C), and the target ActD at various concentrations (2, 1, 0.75, 0.5, and 0.25  $\mu$ M from top to bottom) in 50 mM NaCl buffered with 20 mM Tris-HCl buffer at pH 7.3. The sensorgram was obtained by subtracting the reference control. The black lines represent the fitted curves.

**Figure S9.** A schematic illustration of the binding of ActD to the (CGG)<sub>16</sub> sequence is shown.

**Table SI.** Crystallographic and Refinement Data of ATGCGGCA[br<sup>5</sup>U]- Actinomycin D Complex.

| $\lambda$ for data collection (Å)   | 0.9062    | 0.9195           | 0.9189             | 0.8563      |
|-------------------------------------|-----------|------------------|--------------------|-------------|
|                                     |           | Inflection point | peak               | high remote |
| <b><i>Crystallographic data</i></b> |           |                  |                    |             |
| $a=b$ (Å)                           | 86.93     | 87.07            | 87.09              | 87.08       |
| $c$ (Å)                             | 49.78     | 49.90            | 49.09              | 49.90       |
| Space group                         |           |                  | P6 <sub>5</sub> 22 |             |
| Resolution (Å)                      | 30-2.6    | 50-2.8           | 50-2.8             | 50-2.8      |
| # reflections (>0 $\sigma(I)$ )     | 48854     | 35451            | 38138              | 35367       |
| $\langle I/\sigma(I) \rangle$       | 27.0      | 37.1             | 20.5               | 36.1        |
| R <sub>merge</sub> (%)              | 9.7       | 7.7              | 6.9                | 7.8         |
| Completeness (%)                    | 99.8      | 99.5             | 99.6               | 99.5        |
| <b><i>Refinement data</i></b>       |           |                  |                    |             |
| R-factor/R-free (5% data)           | 0.26/0.29 |                  |                    |             |
| r.m.s.d. (Å)                        | 0.004     |                  |                    |             |
| r.m.s.d. (°)                        | 1.40      |                  |                    |             |
| # of DNA atoms                      | 366       |                  |                    |             |
| # of drug atoms                     | 179       |                  |                    |             |
| # of waters                         | 133       |                  |                    |             |
| *Including Friedel's pairs          |           |                  |                    |             |

**Table SII.** Base pair parameters for the ActD-(ATGCGGCAT)<sub>2</sub> complex.

| <b>Local base-pair parameters</b> |                  |                    |                    |                   |                      |                    |
|-----------------------------------|------------------|--------------------|--------------------|-------------------|----------------------|--------------------|
| <b>bp</b>                         | <b>Shear (Å)</b> | <b>Stretch (Å)</b> | <b>Stagger (Å)</b> | <b>Buckle (°)</b> | <b>Propeller (°)</b> | <b>Opening (°)</b> |
| <b>A1-T18</b>                     | -1.26            | 0.17               | 0.51               | -3.39             | -13.36               | 8.51               |
| <b>T2-A17</b>                     | -0.34            | -0.17              | 0.55               | -11.87            | -17.21               | 0.73               |
| <b>G3-C16</b>                     | -0.41            | -0.36              | 0.97               | 7.55              | 18.33                | 1.21               |
| <b>C4+G14</b>                     | -0.57            | 2.76               | 0.87               | 4.06              | 28.70                | -120.37            |
| <b>G5-C13</b>                     | -0.29            | -0.24              | 0.52               | 5.02              | 11.40                | -16.18             |
| <b>C7-G12</b>                     | -0.43            | -0.07              | -0.84              | 14.84             | 22.04                | -3.99              |
| <b>A8-T11</b>                     | -0.08            | 0.54               | 1.01               | 39.48             | -21.43               | 11.35              |
| <b>T9-A10</b>                     | -1.31            | -0.47              | 0.87               | 29.22             | -17.37               | 7.00               |

| <b>Local base-pair parameters</b> |                  |                  |                 |                 |                 |                  |
|-----------------------------------|------------------|------------------|-----------------|-----------------|-----------------|------------------|
| <b>step</b>                       | <b>Shift (Å)</b> | <b>Slide (Å)</b> | <b>Rise (Å)</b> | <b>Tilt (°)</b> | <b>Roll (°)</b> | <b>Twist (°)</b> |
| <b>AT/AT</b>                      | -0.95            | -0.33            | 3.55            | 1.55            | -13.23          | 32.94            |
| <b>TG/CA</b>                      | 1.01             | 2.00             | 3.38            | -5.84           | 3.92            | 35.05            |
| <b>GC/GC</b>                      | 0.43             | 0.89             | 8.21            | 2.59            | 10.37           | 62.47            |
| <b>CG/CG</b>                      | 0.61             | 3.13             | 2.95            | 14.56           | 21.32           | -43.45           |
| <b>GC/GC</b>                      | 0.80             | 2.94             | 6.68            | 11.52           | 10.20           | 5.84             |
| <b>CA/TG</b>                      | 0.12             | 1.92             | 2.98            | -1.54           | -1.17           | 35.43            |
| <b>AT/AT</b>                      | 0.69             | -1.31            | 3.25            | -4.43           | 0.89            | 31.70            |

**Table SIII.** Nucleic acid backbone torsion angles obtained for the ActD-(ATGCGGCAT)<sub>2</sub> complex.

| <b>Strand I</b>  |          |         |          |          |            |        |        |           |
|------------------|----------|---------|----------|----------|------------|--------|--------|-----------|
| <b>Base</b>      | $\alpha$ | $\beta$ | $\gamma$ | $\delta$ | $\epsilon$ | $\xi$  | $\chi$ | Puckering |
| <b>A-1</b>       | ----     | ----    | 51.7     | 146.9    | -159.1     | -97.6  | -102.5 | C2'-endo  |
| <b>T-2</b>       | -105.7   | 78.3    | 163.0    | 144.1    | -121.8     | -47.6  | -166.2 | C2'-endo  |
| <b>G-3</b>       | -76.6    | 163.5   | 31.1     | 138.1    | -156.8     | -128.7 | -70.7  | C2'-endo  |
| <b>C-4</b>       | -85.9    | -140.4  | 34.4     | 139.4    | 176.1      | -117.2 | -58.5  | C2'-endo  |
| <b>G-5</b>       | -53.2    | -169.8  | 41.5     | 141.8    | -157.5     | -115.6 | -58.9  | C2'-endo  |
| <b>G-6</b>       | 58.7     | 142.7   | -50.8    | 162.3    | -90.3      | 102.4  | -100.6 | C3'-exo   |
| <b>C-7</b>       | -118.0   | 175.1   | 46.5     | 145.2    | -83.1      | 118.4  | -83.7  | C2'-endo  |
| <b>A-8</b>       | 119.3    | -113.4  | 149.5    | 145.0    | -157.9     | -109.2 | -95.3  | C2'-endo  |
| <b>T-9</b>       | 34.2     | -147.6  | -85.5    | 142.6    | ----       | ----   | -121.3 | C2'-endo  |
| <b>Strand II</b> |          |         |          |          |            |        |        |           |
| <b>Base</b>      | $\alpha$ | $\beta$ | $\gamma$ | $\delta$ | $\epsilon$ | $\xi$  | $\chi$ | Puckering |
| <b>T-18</b>      | -104.1   | 67.3    | 171.4    | 148.2    | ----       | ----   | -155.6 | C2'-endo  |
| <b>A-17</b>      | -60.7    | 128.2   | 51.4     | 150.4    | -164.8     | -75.2  | -86.0  | C2'-endo  |
| <b>C-16</b>      | 101.1    | -143.2  | 176.6    | 131.9    | -80.6      | -149.6 | -162.9 | C2'-endo  |
| <b>G-15</b>      | -47.1    | 174.6   | 46.3     | 148.4    | -109.6     | 78.6   | -112.3 | C2'-endo  |
| <b>G-14</b>      | -18.2    | -140.8  | -50.1    | 153.0    | -133.7     | -87.8  | 108.0  | C3'-exo   |
| <b>C-13</b>      | -57.1    | -111.7  | -58.1    | 149.1    | -163.3     | -94.7  | -58.6  | C3'-exo   |
| <b>G-12</b>      | -76.9    | -168.3  | 51.9     | 144.3    | -131.5     | -82.5  | -82.2  | C2'-endo  |
| <b>T-11</b>      | 56.3     | 144.4   | -54.5    | 142.8    | -177.6     | -93.3  | -105.1 | C2'-endo  |
| <b>A-10</b>      | ----     | ----    | 59.3     | 151.0    | -172.7     | -120.3 | -143.4 | C3'-exo   |

Figure S1

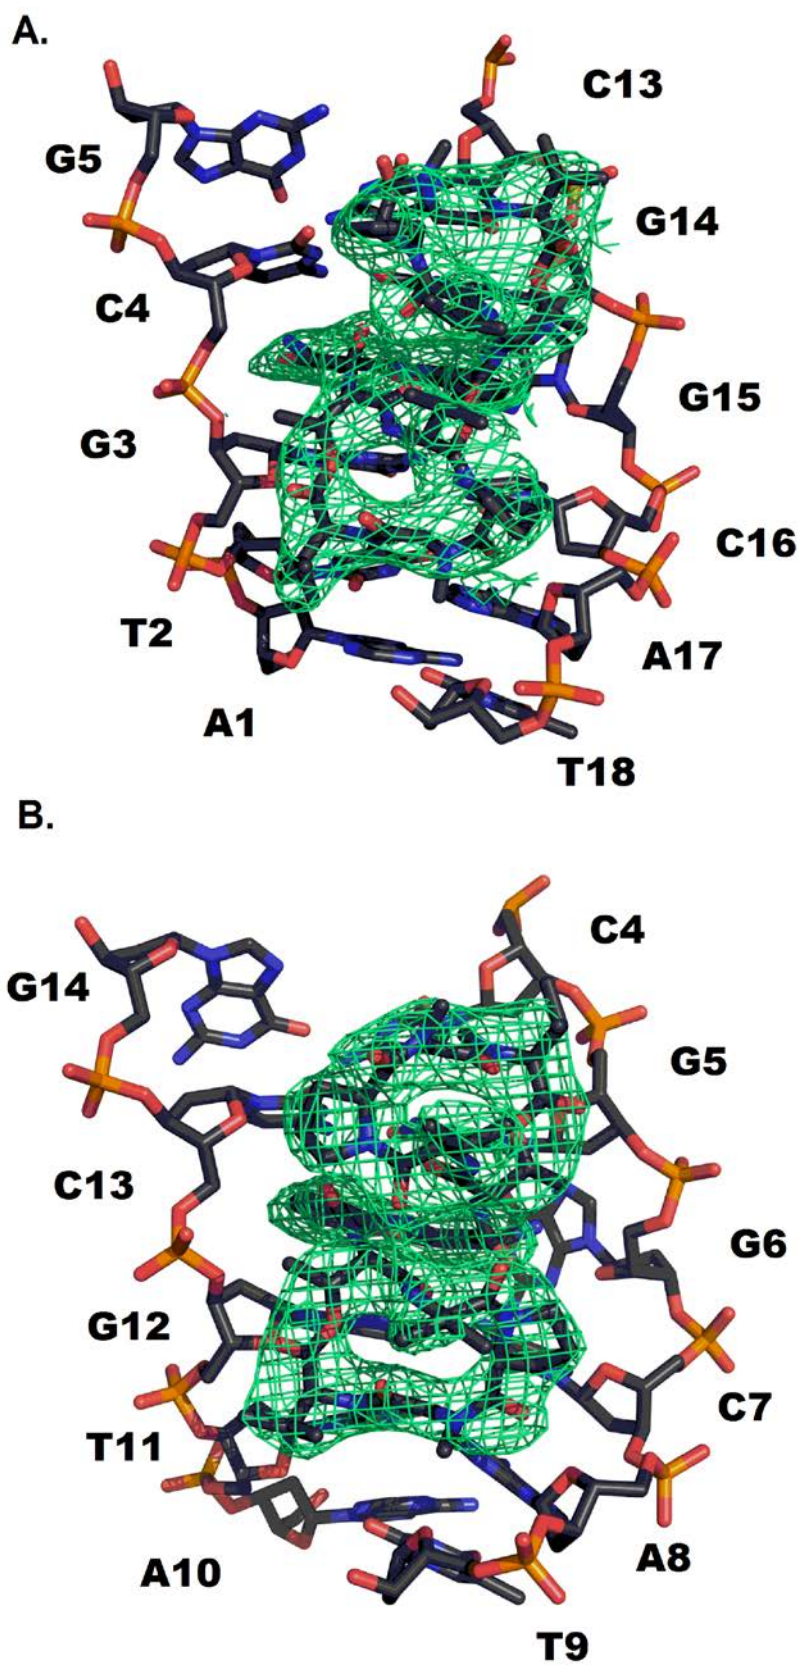

Figure S2

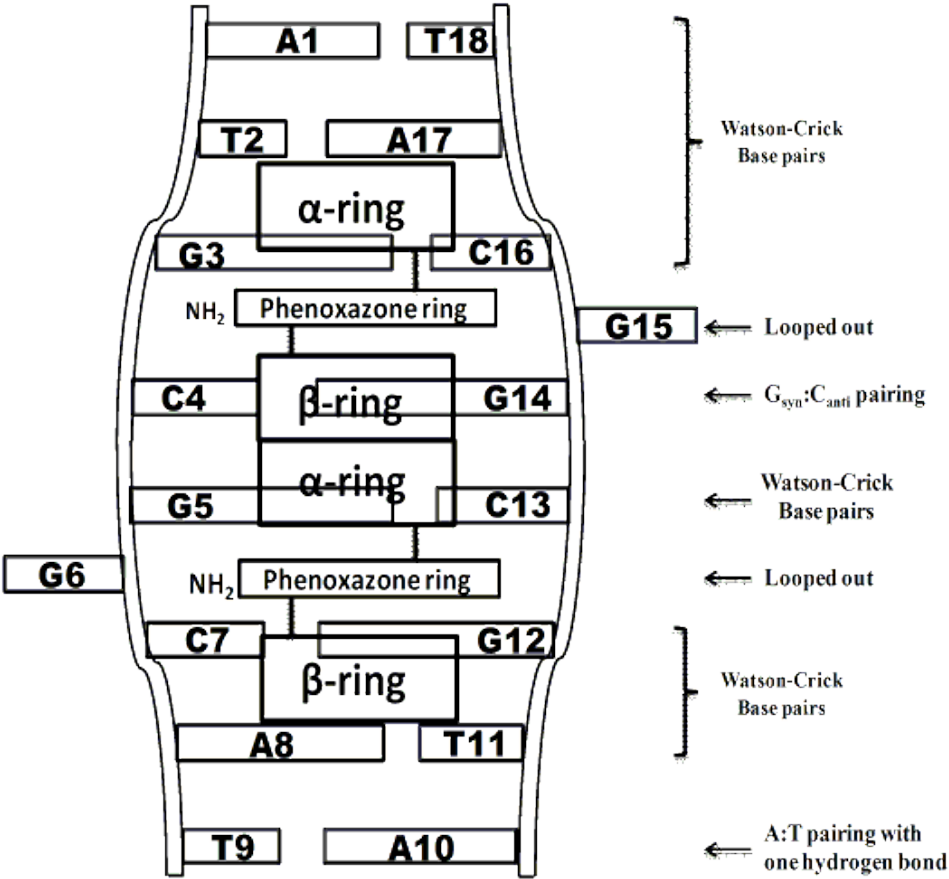



Figure S3

A.

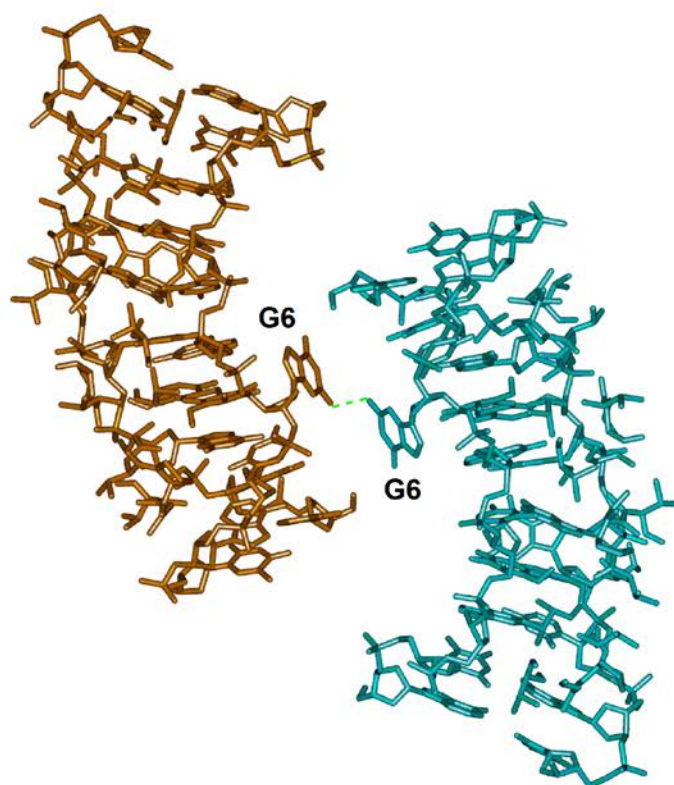

B.

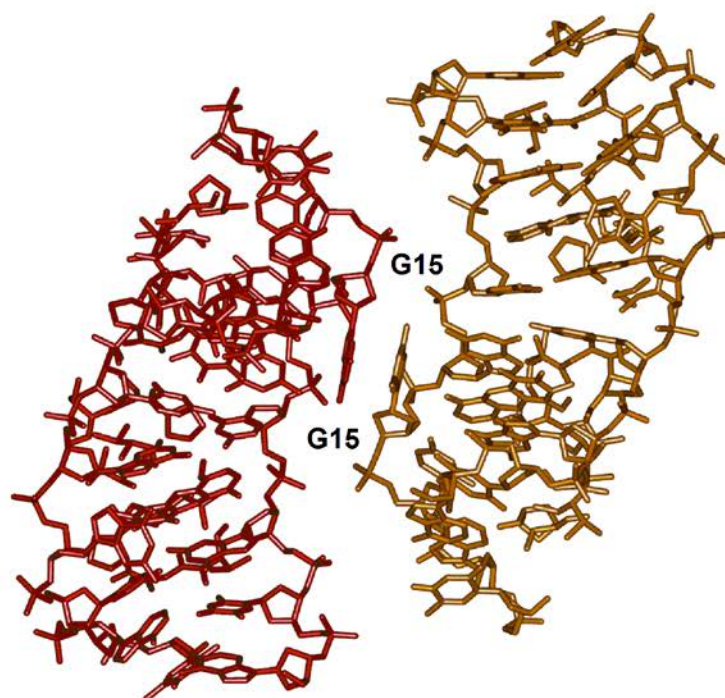

**Figure S4**

**A**

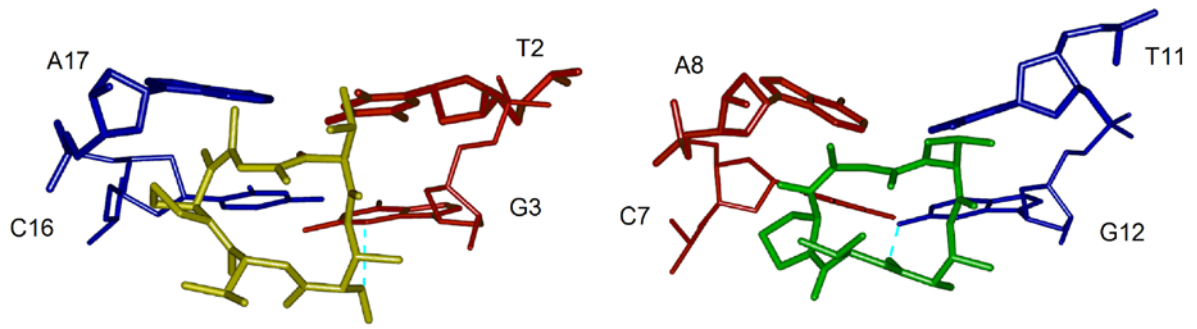

**B**

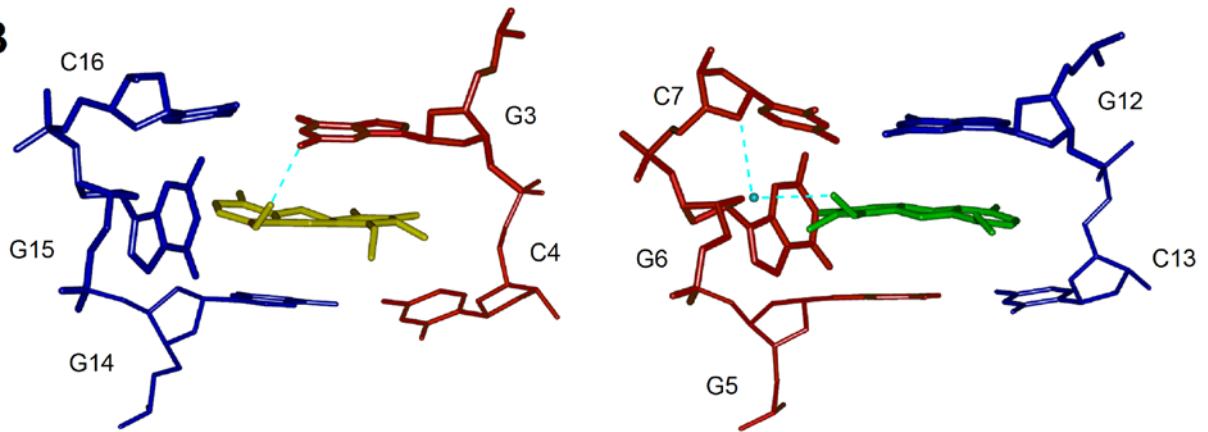

**C**

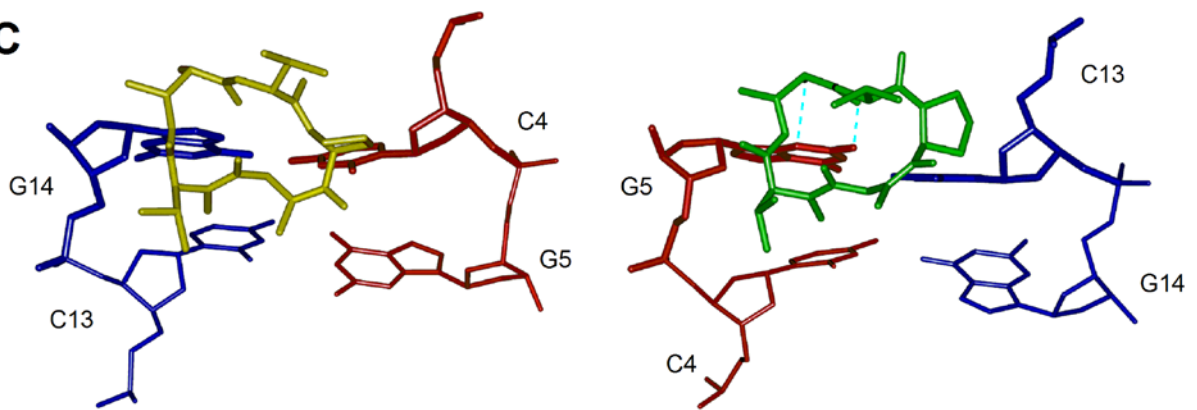

Figure S5

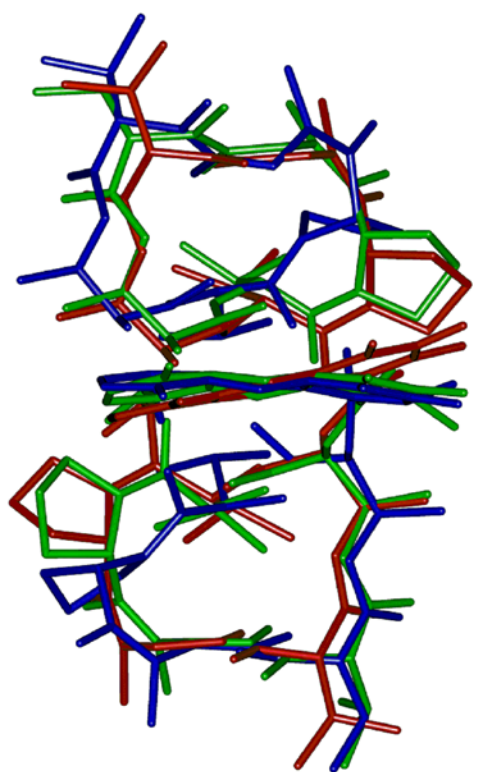

(Front view)

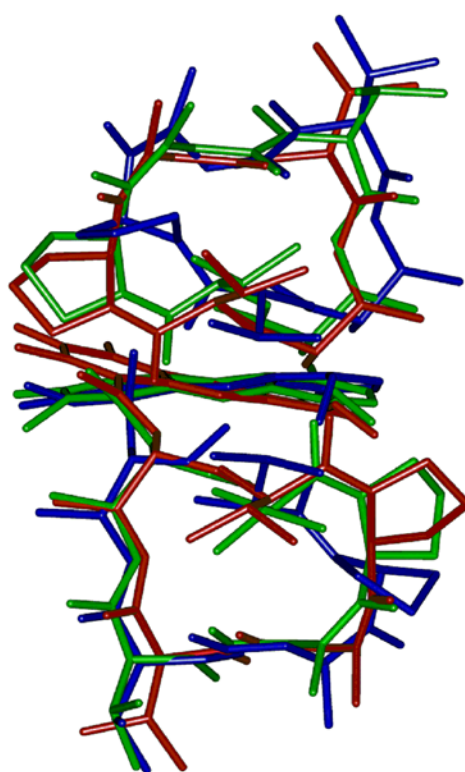

(Back view)

Figure S6

A.

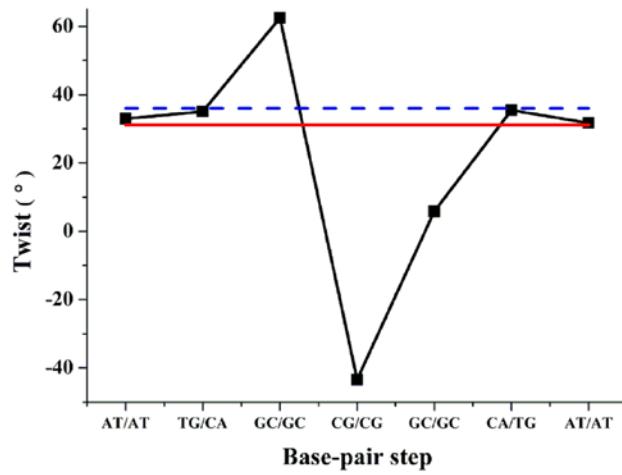

B.

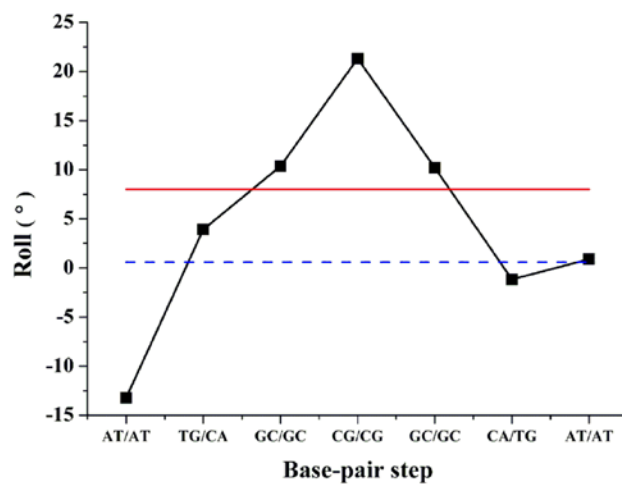

C.

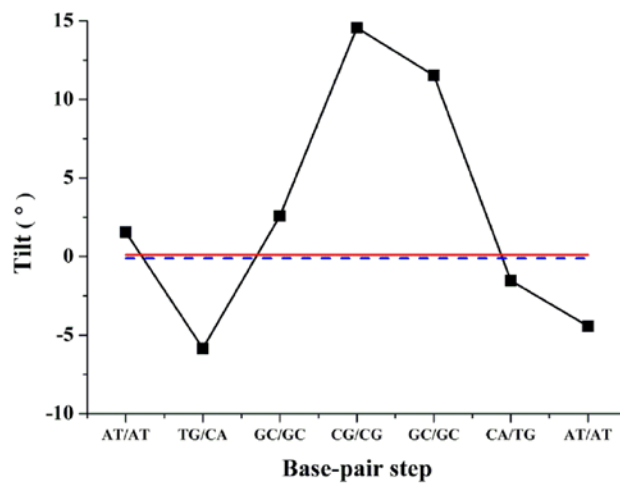

Figure S7

A.

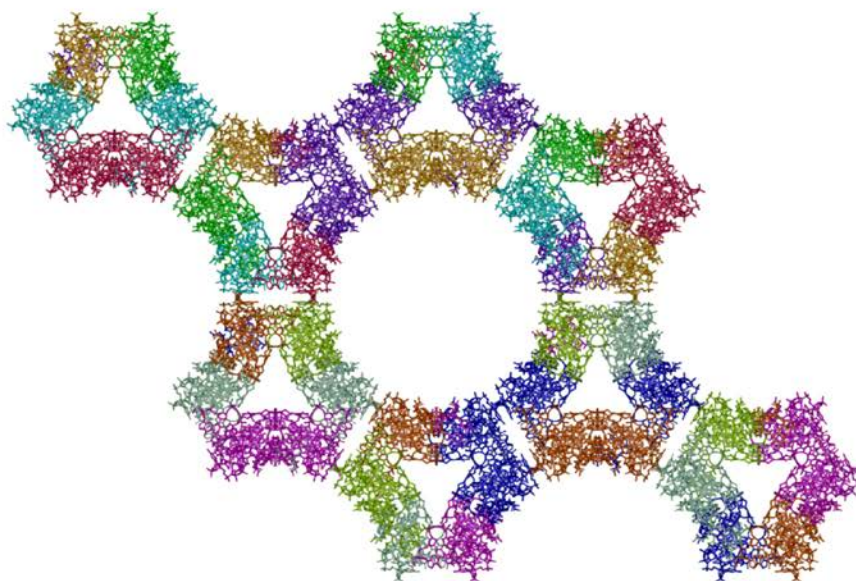

B.

Van der Waals contact

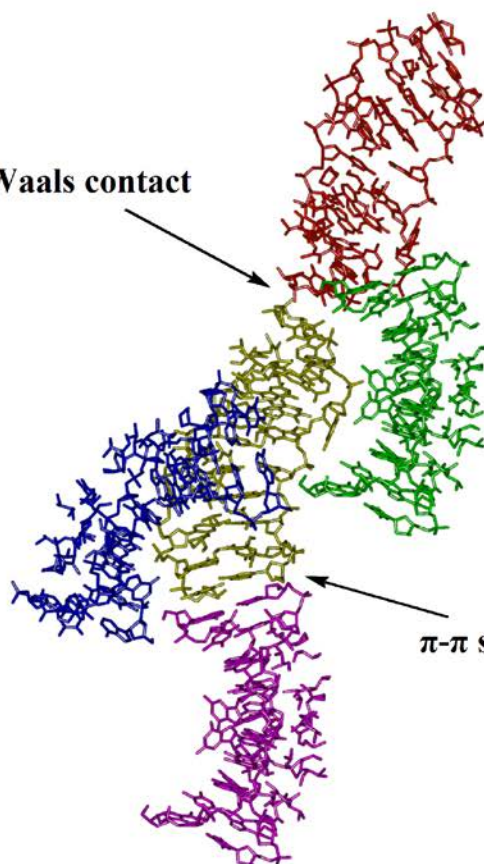

$\pi$ - $\pi$  stacking interaction

Figure S8

A.

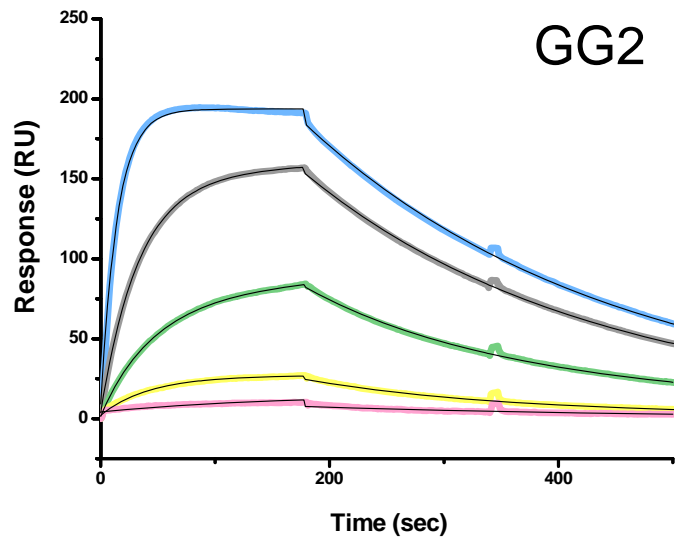

B.

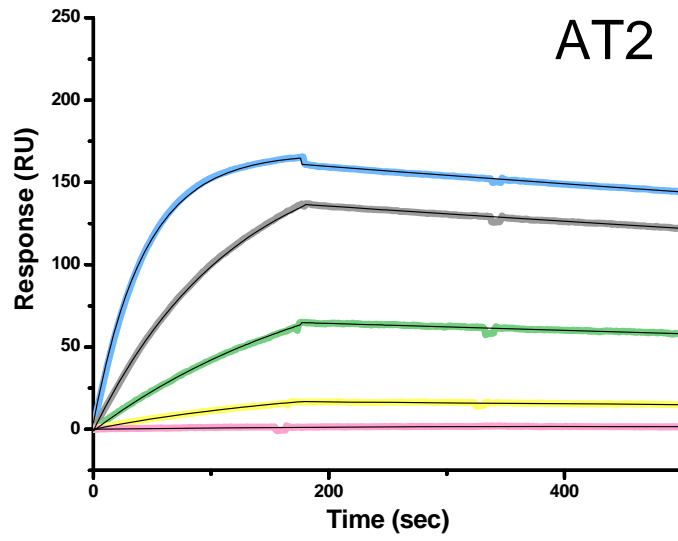

C.

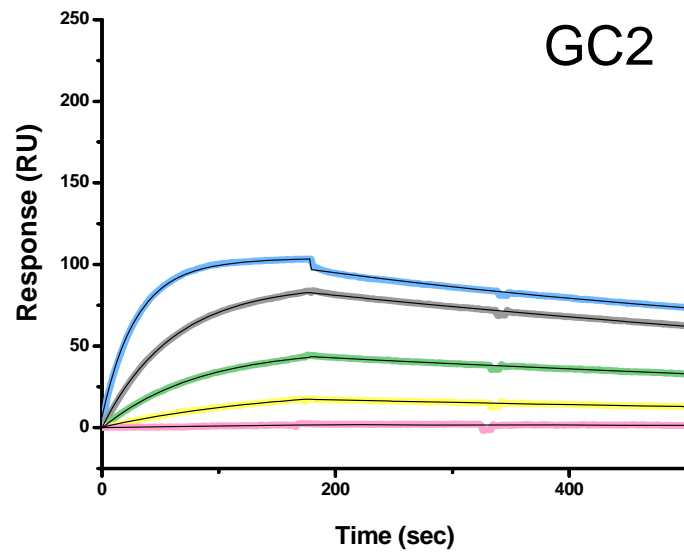

Figure S9

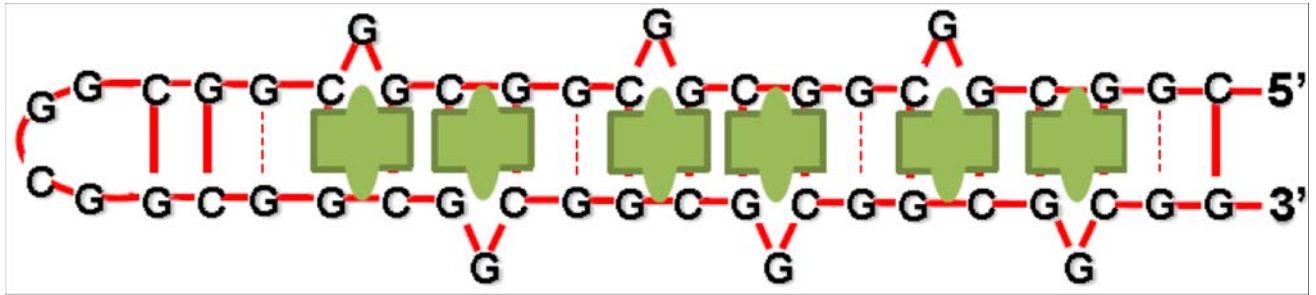

Supplement: supp_gkt084_nar-03084-f-2012-File003.pdf [file supp_gkt084_nar-03084-f-2012-File003.pdf]
